# Supplementary material for: Extensive accumulation of misfolded protein aggregates during natural aging and senescence
Source: PubMed Central journal article supplement (PMC9909609; doi:10.3389/fnagi.2022.1090109), 2023-01-26
Supplement: Data_Sheet_1.pdf [file Data_Sheet_1.pdf]

## Supplementary Materials

### Supplementary Table 1. Enriched biological processes in the young mouse brain insoluble proteome.

Analysis was carried out using the Database for Annotation, Visualization and Integrated Discovery (DAVID)

v6.8. EASE score p value: modified Fisher exact p value ( $p \leq 0.05$ ).

| <b>Term</b>                               | <b>P-Value</b>  | <b>Fold Enrichment</b> |
|-------------------------------------------|-----------------|------------------------|
| <b>Neuron projection development</b>      | <b>9.20E-03</b> | <b>19.5</b>            |
| <b>Calcium-mediated signaling</b>         | <b>1.80E-02</b> | <b>106.4</b>           |
| <b>Protein targeting to mitochondrion</b> | <b>2.30E-02</b> | <b>82.2</b>            |
| <b>Mitochondrion morphogenesis</b>        | <b>3.30E-02</b> | <b>56.5</b>            |
| <b>Nervous system development</b>         | <b>5.90E-02</b> | <b>7.2</b>             |

**Supplementary Table 2; List of all insoluble proteins in the aging proteome**

| <b>Accession</b> | <b>Description</b>                                                                 |
|------------------|------------------------------------------------------------------------------------|
| Q11011           | Puromycin-sensitive aminopeptidase                                                 |
| Q3TZ32           | Putative uncharacterized protein                                                   |
| Q8R0Y6           | Aldehyde dehydrogenase family 1 member L1                                          |
| Q8C0M9           | L-asparaginase                                                                     |
| E9Q6Q4           | Uncharacterized protein                                                            |
| Q9R0P5           | Dextrin                                                                            |
| O08709           | Peroxiredoxin-6                                                                    |
| Q3TED3           | Putative uncharacterized protein                                                   |
| Q3TP62           | Pleckstrin homology domain containing, family B (Evectins) member 1, isoform CRA_b |
| Q9R0P9           | Ubiquitin carboxyl-terminal hydrolase isozyme L1                                   |
| Q8BL66           | Early endosome antigen 1                                                           |
| A3KME3           | Kbtbd11 protein                                                                    |
| A2AGT5           | Cytoskeleton-associated protein 5                                                  |
| P16054           | Protein kinase C epsilon type                                                      |
| Q05DT0           | Add3 protein (Fragment)                                                            |
| O55023           | Inositol monophosphatase 1                                                         |
| Q9ES97           | Reticulon-3 OS=Mus musculus GN=Rtn3 PE=1 SV=2 - [RTN3_MOUSE]                       |
| Q9WV34           | MAGUK p55 subfamily member 2                                                       |
| Q3TEU8           | Putative uncharacterized protein                                                   |
| Q3TPI3           | Putative uncharacterized protein (Fragment)                                        |
| Q5BL10           | Kinesin family member 5B                                                           |
| A2A7X3           | Ubiquitin-conjugating enzyme                                                       |
| Q6ZQ38           | Cullin-associated NEDD8-dissociated protein 1                                      |
| Q6P5F9           | Exportin-1                                                                         |
| Q8K1M6           | Dynamin-1-like protein                                                             |
| P10637           | Microtubule-associated protein tau                                                 |
| Q9CS42           | Ribose-phosphate pyrophosphokinase 2                                               |
| Q91V12           | Cytosolic acyl coenzyme A thioester hydrolase                                      |
| Q80TL0           | Protein phosphatase 1E                                                             |
| Q3TE06           | Putative uncharacterized protein (Fragment)                                        |
| B1AQW3           | Microtubule-associated protein                                                     |
| P28738           | Kinesin heavy chain isoform 5C                                                     |
| Q8R3V5           | Endophilin-B2                                                                      |
| Q4KMM3           | Oxidation resistance protein 1                                                     |
| E9PUD2           | Uncharacterized protein                                                            |
| Q5EBJ4           | Ermin                                                                              |
| Q99P72           | Reticulon-4                                                                        |
| Q76MZ3           | Serine/threonine-protein phosphatase 2A 65 kDa regulatory subunit A alpha isoform  |
| Q9Z0E0           | Neurochondrin                                                                      |
| Q60829           | Protein phosphatase 1 regulatory subunit 1B                                        |

|        |                                                             |
|--------|-------------------------------------------------------------|
| Q8C437 | PEX5-related protein                                        |
| P51410 | 60S ribosomal protein L9                                    |
| E9QM49 | Uncharacterized protein                                     |
| Q8BGT8 | Phytanoyl-CoA hydroxylase-interacting protein-like          |
| Q547J4 | Microtubule-associated protein                              |
| Q9R0Y5 | Adenylate kinase isoenzyme 1                                |
| E9QP92 | Uncharacterized protein                                     |
| Q9CZC8 | Secernin-1                                                  |
| Q8K0S0 | Phytanoyl-CoA hydroxylase-interacting protein               |
| Q61553 | Fascin                                                      |
| O70161 | Phosphatidylinositol-4-phosphate 5-kinase type-1 gamma      |
| Q3TJ97 | Putative uncharacterized protein                            |
| Q3UZJ4 | Putative uncharacterized protein                            |
| Q52KE3 | Gna1 protein (Fragment)                                     |
| Q6NZL0 | Uncharacterized protein C6orf174 homolog                    |
| E9Q2A6 | Uncharacterized protein                                     |
| Q5SQB0 | Nucleophosmin 1                                             |
| Q9CYT6 | Adenylyl cyclase-associated protein                         |
| Q00PI9 | Heterogeneous nuclear ribonucleoprotein U-like protein 2    |
| Q3TT18 | Putative uncharacterized protein                            |
| P14106 | Complement C1q subcomponent subunit B                       |
| Q7TQD2 | Tubulin polymerization-promoting protein                    |
| P61922 | 4-aminobutyrate aminotransferase, mitochondrial             |
| Q99PU5 | Long-chain-fatty-acid--CoA ligase ACSBG1                    |
| P58252 | Elongation factor 2                                         |
| E9Q2W9 | Uncharacterized protein                                     |
| Q3UF82 | Putative uncharacterized protein                            |
| Q02053 | Ubiquitin-like modifier-activating enzyme 1                 |
| Q3U8N1 | Putative uncharacterized protein                            |
| Q60668 | Heterogeneous nuclear ribonucleoprotein D0                  |
| Q99LC5 | Electron transfer flavoprotein subunit alpha, mitochondrial |
| Q8K0T0 | Reticulon-1                                                 |
| Q3TFD9 | Putative uncharacterized protein                            |
| Q3TI27 | Ribose-phosphate pyrophosphokinase                          |
| P70296 | Phosphatidylethanolamine-binding protein 1                  |
| E9PZV5 | Uncharacterized protein                                     |
| E9QAC7 | Uncharacterized protein                                     |
| P03995 | Glial fibrillary acidic protein                             |
| A2AN08 | E3 ubiquitin-protein ligase UBR4                            |
| Q9D6R2 | Isocitrate dehydrogenase [NAD] subunit alpha, mitochondrial |
| Q9D394 | Protein RUFY3                                               |
| Q80SW1 | Putative adenosylhomocysteinase 2                           |
| E9PZ90 | Uncharacterized protein                                     |

|        |                                                             |
|--------|-------------------------------------------------------------|
| P09528 | Ferritin heavy chain                                        |
| Q9Z140 | Copine-6                                                    |
| P47738 | Aldehyde dehydrogenase, mitochondrial                       |
| O35098 | Dihydropyrimidinase-related protein 4                       |
| E9Q7H5 | Uncharacterized protein                                     |
| P19096 | Fatty acid synthase                                         |
| Q9QYG0 | Protein NDRG2                                               |
| P62196 | 26S protease regulatory subunit 8                           |
| Q8C522 | Endonuclease domain-containing 1 protein                    |
| Q8C5R8 | Ribose-phosphate pyrophosphokinase                          |
| P61161 | Actin-related protein 2                                     |
| Q99JY0 | Trifunctional enzyme subunit beta, mitochondrial            |
| P57780 | Alpha-actinin-4                                             |
| Q5FW75 | Actinin alpha 2                                             |
| Q7M6W1 | RTN1-C                                                      |
| Q9Z0H8 | CAP-Gly domain-containing linker protein 2                  |
| E9PUE7 | Uncharacterized protein                                     |
| E9QK48 | Uncharacterized protein                                     |
| P80318 | T-complex protein 1 subunit gamma                           |
| Q8K232 | Adducin 1 (Alpha)                                           |
| Q99PT1 | Rho GDP-dissociation inhibitor 1                            |
| P63005 | Platelet-activating factor acetylhydrolase IB subunit alpha |
| Q3TGW0 | Putative uncharacterized protein                            |
| Q8BH66 | Atlastin-1                                                  |
| Q3UYN2 | Putative uncharacterized protein                            |
| P00920 | Carbonic anhydrase 2                                        |
| Q3TI61 | Putative uncharacterized protein                            |
| Q9JME5 | AP-3 complex subunit beta-2                                 |
| Q7TT10 | Adaptor-related protein complex 2, sigma 1 subunit          |
| Q9QZE5 | Coatomer subunit gamma                                      |
| Q3U0C4 | Putative uncharacterized protein                            |
| E9Q105 | Uncharacterized protein                                     |
| E9Q3M3 | Uncharacterized protein                                     |
| Q9QUM9 | Proteasome subunit alpha type-6                             |
| Q3TED2 | Programmed cell death 6 interacting protein                 |
| P62204 | Calmodulin                                                  |
| P27546 | Microtubule-associated protein 4                            |
| P62748 | Hippocalcin-like protein 1                                  |
| A2ALS5 | Rap1 GTPase-activating protein                              |
| Q61699 | Heat shock protein 105 kDa                                  |
| Q9QYB8 | Beta-adducin                                                |
| E9QM56 | Uncharacterized protein                                     |
| Q5SUT0 | Ewing sarcoma breakpoint region 1                           |

|        |                                                                         |
|--------|-------------------------------------------------------------------------|
| D3Z0M7 | Dynein cytoplasmic 1 intermediate chain 1, isoform CRA_a                |
| Q8BH80 | Vesicle-associated membrane protein, associated protein B and C         |
| Q9R0Q6 | Actin-related protein 2/3 complex subunit 1A                            |
| P80313 | T-complex protein 1 subunit eta                                         |
| Q3TFE8 | Putative uncharacterized protein                                        |
| A1BN54 | Alpha actinin 1a                                                        |
| O35954 | Membrane-associated phosphatidylinositol transfer protein 1             |
| Q3UCX7 | Putative uncharacterized protein                                        |
| P62830 | 60S ribosomal protein L23                                               |
| P35278 | Ras-related protein Rab-5C                                              |
| Q9EQF6 | Dihydropyrimidinase-related protein 5                                   |
| P35700 | Peroxiredoxin-1                                                         |
| Q7TPR4 | Alpha-actinin-1                                                         |
| P62137 | Serine/threonine-protein phosphatase PP1-alpha catalytic subunit        |
| P28663 | Beta-soluble NSF attachment protein                                     |
| Q9EPN1 | Neurobeachin                                                            |
| Q3TTF6 | Putative uncharacterized protein                                        |
| P70333 | Heterogeneous nuclear ribonucleoprotein H2                              |
| P49615 | Cyclin-dependent kinase 5                                               |
| Q8R2D4 | MCG140223 ]                                                             |
| Q3UNH4 | G protein-regulated inducer of neurite outgrowth 1                      |
| E9Q7S0 | Uncharacterized protein                                                 |
| Q3U781 | MCG21131, isoform CRA_a                                                 |
| Q9D7X3 | Dual specificity protein phosphatase 3                                  |
| A2AD25 | MCG49690                                                                |
| O70435 | Proteasome subunit alpha type-3                                         |
| Q9D6C8 | Putative uncharacterized protein                                        |
| Q3THL2 | Putative uncharacterized protein                                        |
| E9QKZ6 | Uncharacterized protein                                                 |
| Q9CYH2 | UPF0765 protein C10orf58 homolog                                        |
| Q5SXY1 | Cytospin-B                                                              |
| A2AKX3 | Probable helicase senataxin                                             |
| Q9JJI8 | 60S ribosomal protein L38                                               |
| Q9CXS4 | Centromere protein V                                                    |
| E9QNW9 | Uncharacterized protein                                                 |
| E9QMF3 | Uncharacterized protein                                                 |
| D4N6R6 | Beta-globin                                                             |
| A2AMH3 | Solute carrier family 44, member 1                                      |
| Q9CX86 | Putative uncharacterized protein                                        |
| P63330 | Serine/threonine-protein phosphatase 2A catalytic subunit alpha isoform |
| Q9DBJ1 | Phosphoglycerate mutase 1                                               |
| Q3TKM5 | Isocitrate dehydrogenase 3 (NAD+), gamma, isoform CRA_c                 |
| Q62348 | Translin                                                                |

|        |                                                                         |
|--------|-------------------------------------------------------------------------|
| P40240 | CD9 antigen                                                             |
| E9QA32 | Uncharacterized protein                                                 |
| Q8CGA0 | Protein phosphatase 1F                                                  |
| D3Z7I9 | Oxysterol-binding protein                                               |
| Q8C550 | Putative uncharacterized protein                                        |
| Q3UNZ8 | Quinone oxidoreductase-like protein 2                                   |
| Q9R1R9 | UBE-1a                                                                  |
| Q8VCW8 | Acyl-CoA synthetase family member 2, mitochondrial                      |
| Q32MV2 | Keratin 82                                                              |
| B2RWW1 | Microtubule-associated protein 1S                                       |
| B1AXF2 | Solute carrier family 24 (Sodium/potassium/calcium exchanger), member 2 |
| O54984 | ATPase Asna1                                                            |
| E9QNK4 | Uncharacterized protein                                                 |
| Q80XK8 | Nbas protein (Fragment)                                                 |
| B1B0C7 | Perlecan (Heparan sulfate proteoglycan 2)                               |
| A2BI13 | PC4 and SFRS1 interacting protein 1 (Fragment)                          |
| Q9CU60 | Putative uncharacterized protein (Fragment)                             |
| Q99LD4 | COP9 signalosome complex subunit 1                                      |
| Q8CE29 | Ubiquitin protein ligase E3A                                            |
| Q9D1P4 | Cysteine and histidine-rich domain-containing protein 1                 |
| Q9CVY8 | Putative uncharacterized protein                                        |
| B2KFD4 | Aspartoacylase (Aminoacylase) 2                                         |
| E9Q197 | Uncharacterized protein                                                 |
| O88543 | COP9 signalosome complex subunit 3                                      |
| E9PX61 | Uncharacterized protein                                                 |
| Q8CCS7 | Calbindin 2, isoform CRA_a                                              |
| Q3TA40 | Putative uncharacterized protein                                        |
| E9Q460 | Uncharacterized protein                                                 |
| Q99K51 | Plastin-3                                                               |
| Q9DAS9 | Guanine nucleotide-binding protein G(I)/G(S)/G(O) subunit gamma-12      |
| B8JJ84 | Syntaxin binding protein 6 (Amisyn) (Fragment)                          |
| Q5M8N4 | Epimerase family protein SDR39U1                                        |
| E9Q5Z3 | Uncharacterized protein                                                 |
| Q99J09 | Methylosome protein 50                                                  |
| Q05BD4 | Prpsap2 protein                                                         |
| Q9CRY7 | Glycerophosphodiester phosphodiesterase domain-containing protein 1     |
| Q9CRE9 | Putative uncharacterized protein (Fragment)                             |
| O35449 | Proline-rich transmembrane protein 1                                    |
| Q61081 | Hsp90 co-chaperone Cdc37                                                |
| Q3TDM2 | Putative uncharacterized protein                                        |
| E9PVZ5 | Uncharacterized protein                                                 |
| P97390 | Vacuolar protein sorting-associated protein 45                          |
| P46664 | Adenylosuccinate synthetase isozyme 2                                   |

|        |                                                                  |
|--------|------------------------------------------------------------------|
| E9QPD4 | Uncharacterized protein                                          |
| B2KFH8 | Parkinson disease (Autosomal recessive, early onset) 7           |
| O09172 | Glutamate--cysteine ligase regulatory subunit                    |
| Q3THK7 | GMP synthase [glutamine-hydrolyzing]                             |
| Q99KC8 | von Willebrand factor A domain-containing protein 5A             |
| Q3V1M8 | Putative uncharacterized protein                                 |
| D3YWK1 | Uncharacterized protein                                          |
| Q99KJ8 | Dynactin subunit 2                                               |
| Q8BVG8 | Beta-arrestin-1                                                  |
| Q60676 | Serine/threonine-protein phosphatase 5                           |
| Q91ZP9 | N-terminal EF-hand calcium-binding protein 2                     |
| Q3TEA8 | Heterochromatin protein 1-binding protein 3                      |
| Q3TDN2 | FAS-associated factor 2                                          |
| P12658 | Calbindin                                                        |
| Q9D358 | Low molecular weight phosphotyrosine protein phosphatase         |
| Q8K2U0 | Map2k4 protein                                                   |
| Q8BN05 | Putative uncharacterized protein (Fragment)                      |
| Q3TW74 | Putative uncharacterized protein                                 |
| Q6DI95 | Transportin 3                                                    |
| P19157 | Glutathione S-transferase P 1                                    |
| Q8BH95 | Enoyl-CoA hydratase, mitochondrial                               |
| E9PV04 | Uncharacterized protein                                          |
| D3YYM6 | Uncharacterized protein                                          |
| Q3U6U7 | Putative uncharacterized protein                                 |
| Q80Y17 | Lethal(2) giant larvae protein homolog 1                         |
| O55091 | Protein IMPACT                                                   |
| Q3UTI7 | Putative uncharacterized protein                                 |
| Q8CAA7 | Glucose 1,6-bisphosphate synthase                                |
| Q91VB8 | Alpha globin 1 ]                                                 |
| B9EHZ5 | Membrane protein, palmitoylated 6 (MAGUK p55 subfamily member 6) |
| P84086 | Complexin-2                                                      |
| Q8R4V2 | Dual specificity protein phosphatase 15                          |
| Q8C7C4 | Putative uncharacterized protein (Fragment)                      |
| Q9DBP5 | UMP-CMP kinase                                                   |
| Q3UM23 | Putative uncharacterized protein                                 |
| Q99K69 | RAS protein activator like 1 (GAP1 like)                         |
| Q8K1J7 | Acyl-CoA synthetase long-chain family member 3                   |
| P48758 | Carbonyl reductase [NADPH] 1                                     |
| A3KGQ6 | Actin-related protein 2/3 complex subunit 5                      |
| Q5UE59 | Kinesin light chain-1                                            |
| P15331 | Peripherin                                                       |
| P35235 | Tyrosine-protein phosphatase non-receptor type 11                |
| P28474 | Alcohol dehydrogenase class-3                                    |

**Supplementary Figure 1. MEFs senescence characterization.** **A)** MEFs population doubling (PD) curve, arrows indicate the samples used in this study; **B)** Phalloidin staining and cellular size quantification in proliferative and senescent MEFs. DAPI (blue), phalloidin (green), n= 30 cells; **C)** 5-Bromo-2'-deoxyuridine (BrdU) incorporation in proliferative and senescent MEFs. DAPI (blue), BrdU (red), n=100 cells. T test, ns  $P > 0.05$ , \* $P \leq 0.05$ , \*\* $P \leq 0.01$ , \*\*\* $P \leq 0.001$ . Average  $\pm$  SEM. Scale bar 200  $\mu\text{m}$ .

**Supplementary Figure 2. Thioflavin T binding was eliminated by harsh proteolytic degradation.** Samples of insoluble proteins were treated with a high concentration of PK (1mg/ml) for 1h at 37 °C. Thioflavin T units of fluorescence was measured as described in methods of: **A)** *C. elegans*, day 1 (D1), day 5 (D5) and day 10 (D10) of adult life, n=3; **B)** MEFs, proliferative (PD=3) and senescent (PD=8), n=3; **C)** Brain; **D)** Heart; **E)** Liver and **F)** Intestine of mouse, young (3 m.o., n=8), adult (12 m.o., n=8) and old (22 m.o., n=4). One way ANOVA, Tukey post-hoc test. Average  $\pm$  SEM.

**Supplementary Figure 3. A)** Confocal microscopy of histological sections of old mouse brain (22 m.o.), co-stained with Thioflavin S (green), aggresome dye (red) and thioflavine analog BTA-1 (blue); **B)** Co-localization of Thioflavin S, aggresome dye and BTA-1 in old (22 m.o.) mouse brain. Scale bar: 10  $\mu\text{m}$ .

**Supplementary Figure 4.** Confocal microscopy of non-stained histological sections of young (3 m.o.), adult (12 m.o.) and old (22 m.o.) mouse brain. Scale bar: 10  $\mu\text{m}$



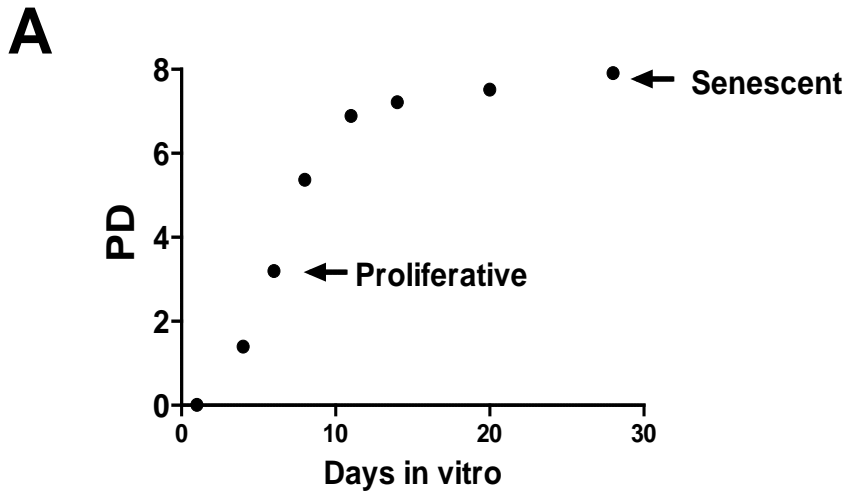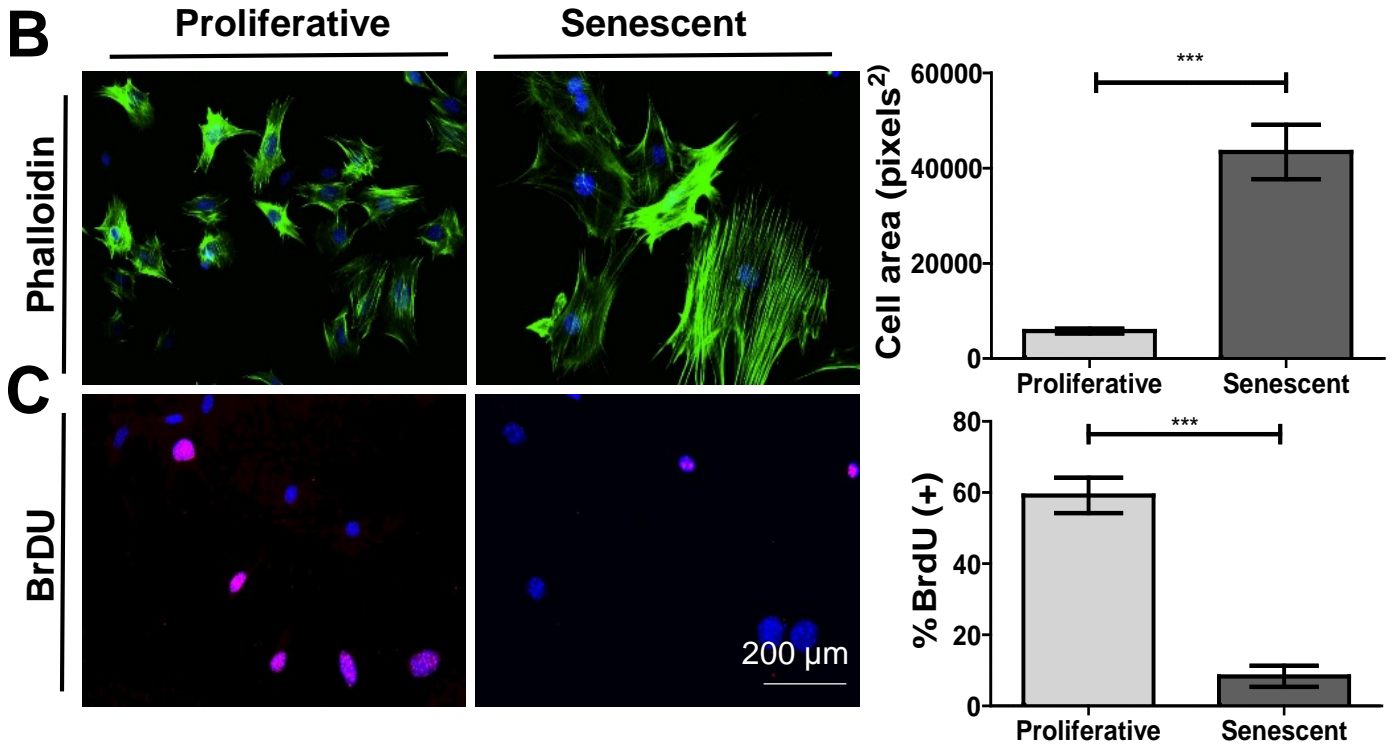

**Supplementary Figure 1**

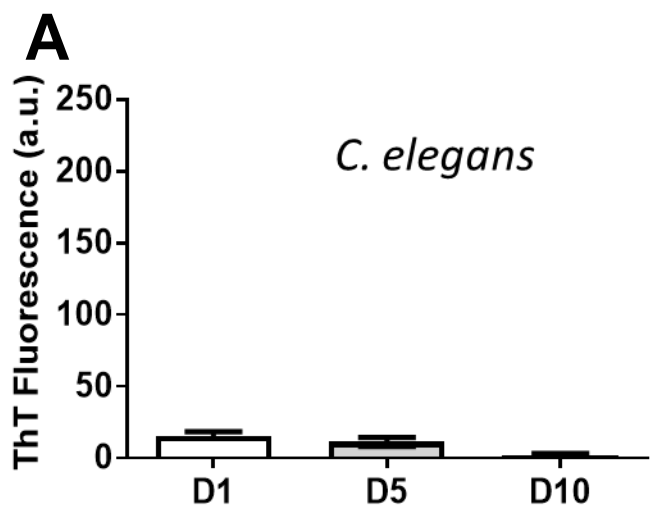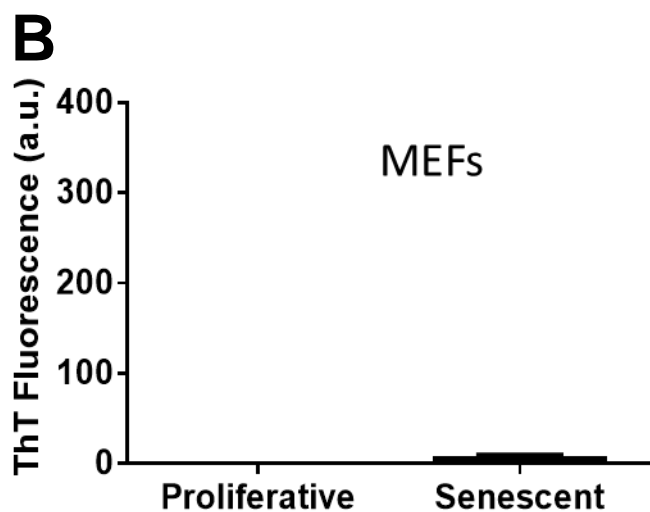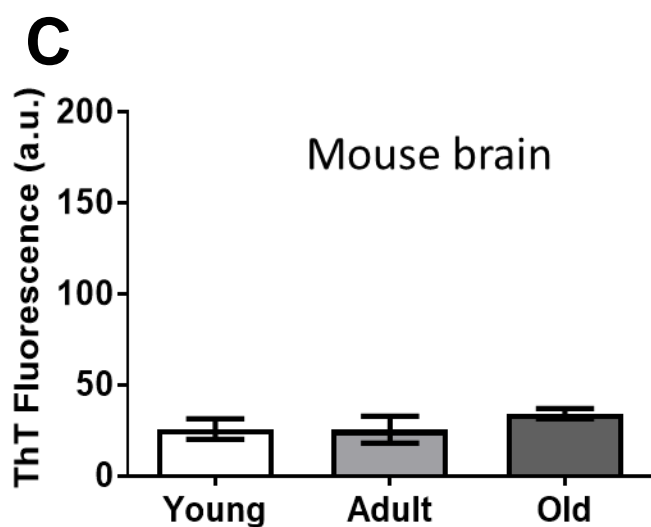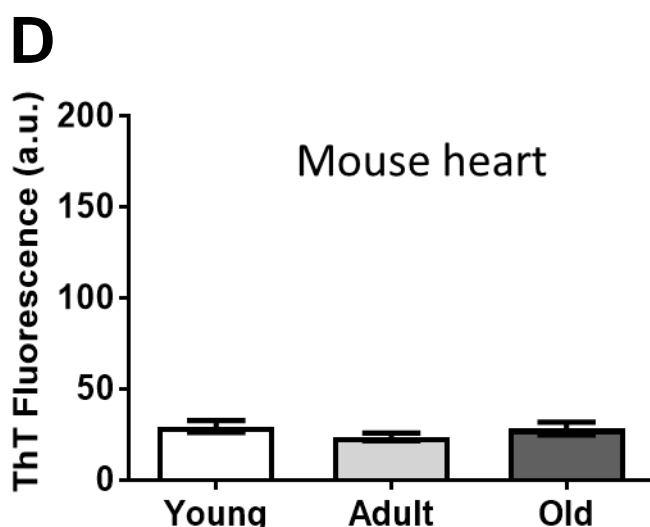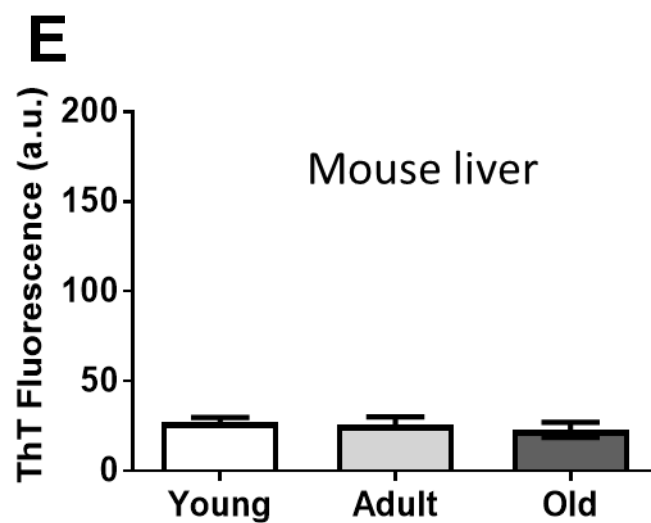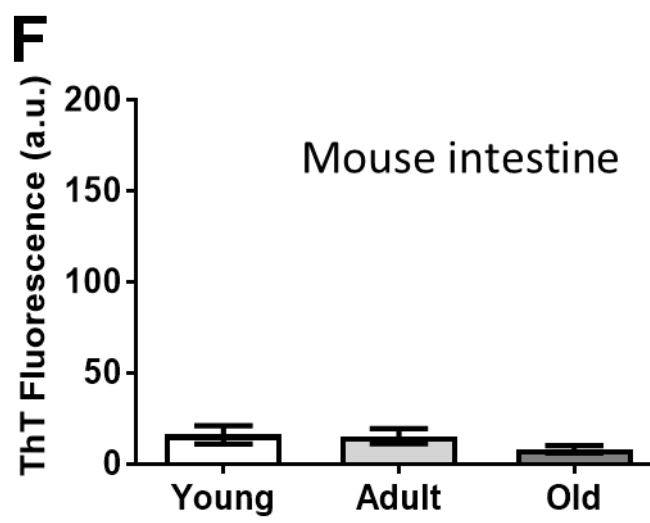

**Supplementary Figure 2**

**BTA**

**ThS**

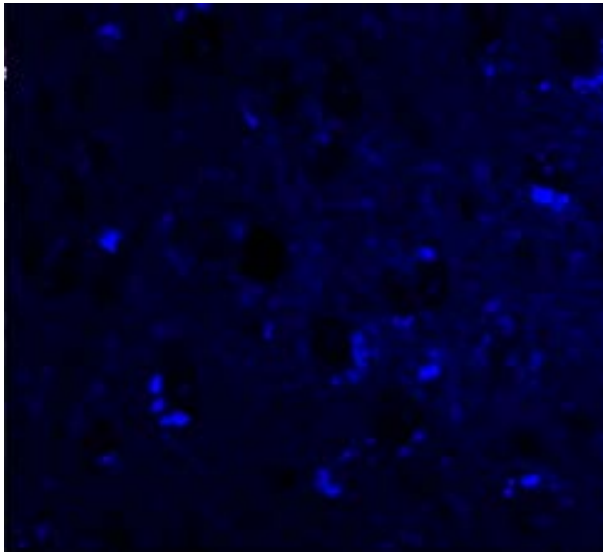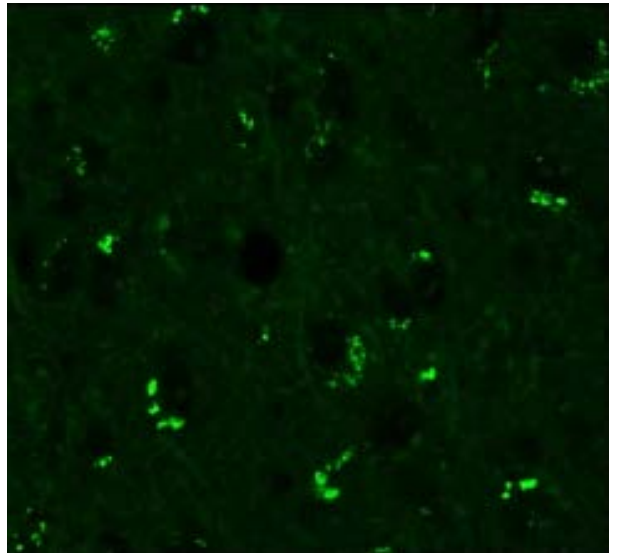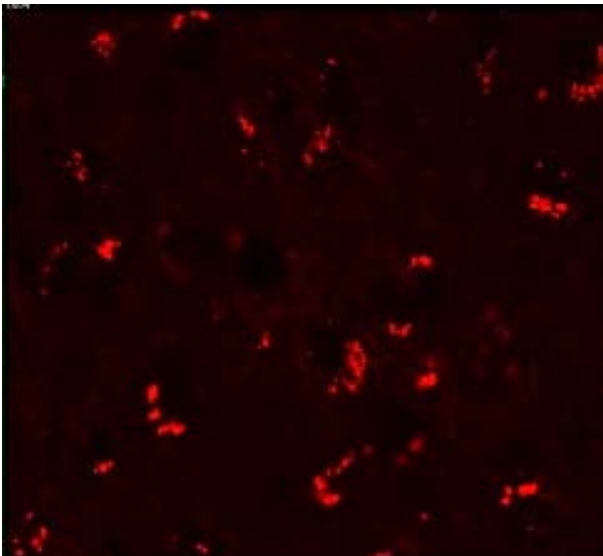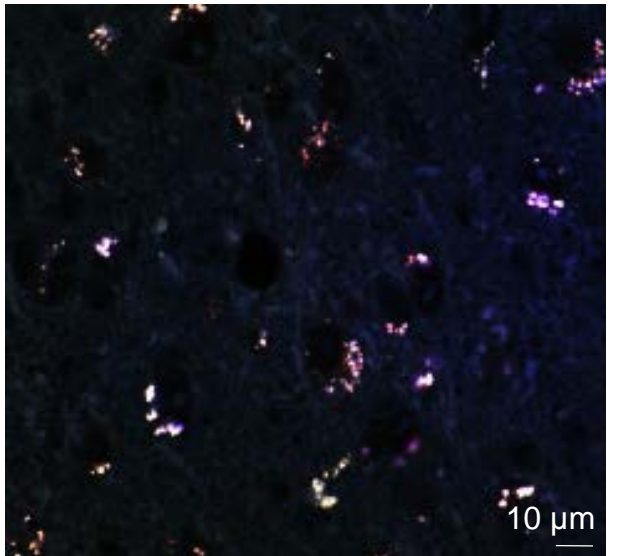

**Aggresome**

**Merge**

**Supplementary Figure 3**

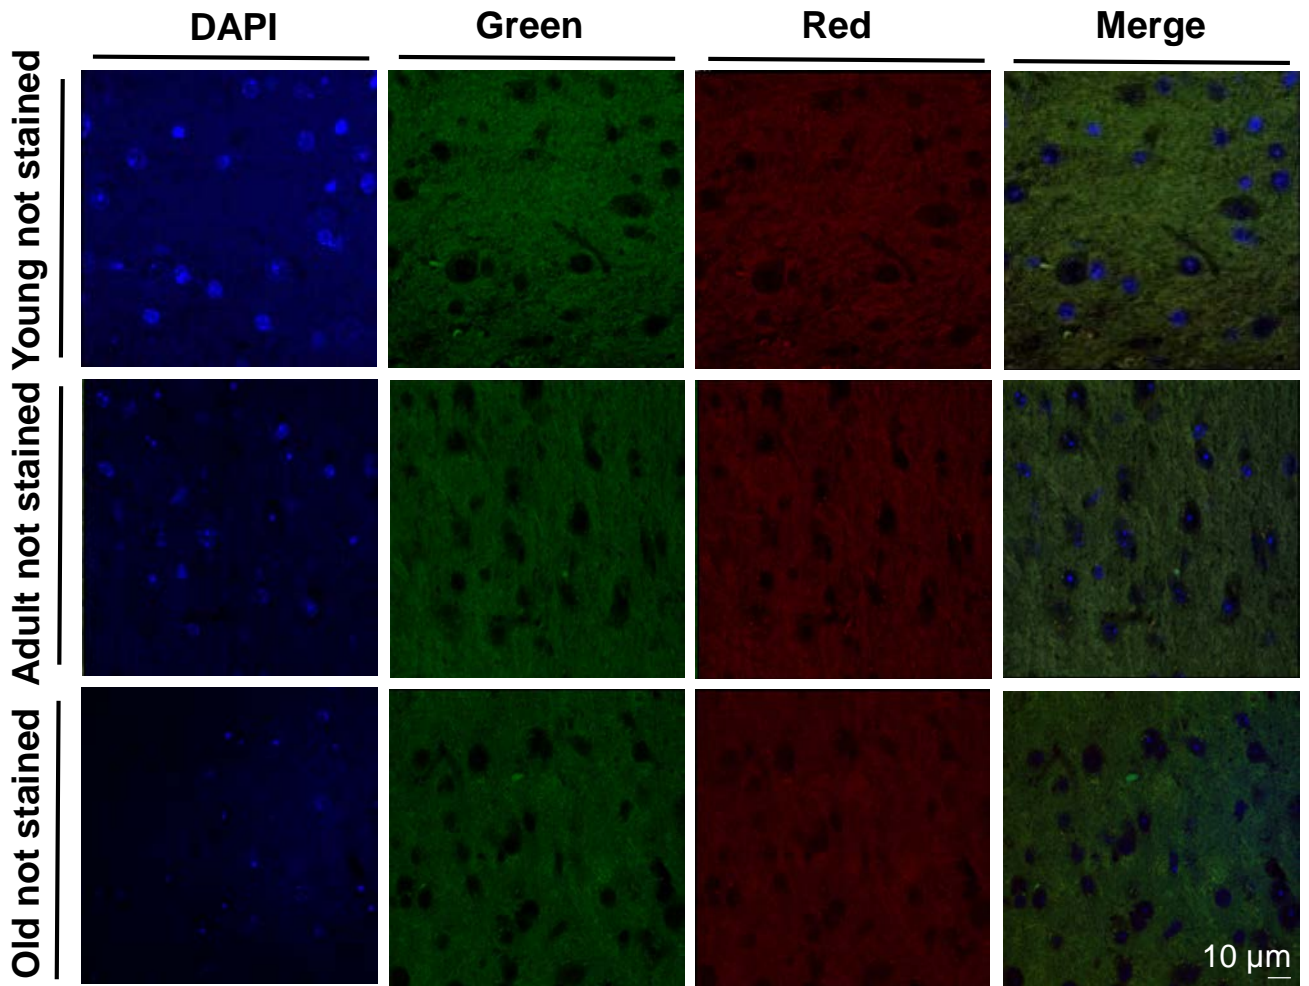

**Supplementary Figure 4**
